# Supplementary material for: Complex Effects of Hemp Fibers and Impact Modifiers in Multiphase Polypropylene Systems
Source: MDPI journal article supplement (doi:10.3390/polym15020409), 2023-01-12
Supplement: s1 [file s1]

# **Complex Effects of Hemp Fibers and Impact Modifiers in Multiphase Polypropylene Systems**

**Denis Mihaela Panaitescu\*, Zina Vuluga\*, Adriana Nicoleta Frone, Augusta Raluca Gabor, Cristian-Andi Nicolae, Cătălina-Diana Uşurelu**

Polymer Department, National Institute for Research and Development in Chemistry and Petrochemistry ICECHIM, 202 Splaiul Independentei, 060021, Bucharest, Romania;  
adriana.frone@icechim.ro (A.N.F.); raluca.gabor@icechim.ro (A.R.G.);  
cristian.nicolae@icechim.ro (C.A.N.); catalina.usurelu@icechim.ro (C.D.U.)

\* Correspondence: [panaitescu@icechim.ro](mailto:panaitescu@icechim.ro) (D.M.P.); [zvuluga@icechim.ro](mailto:zvuluga@icechim.ro) (Z.V.);

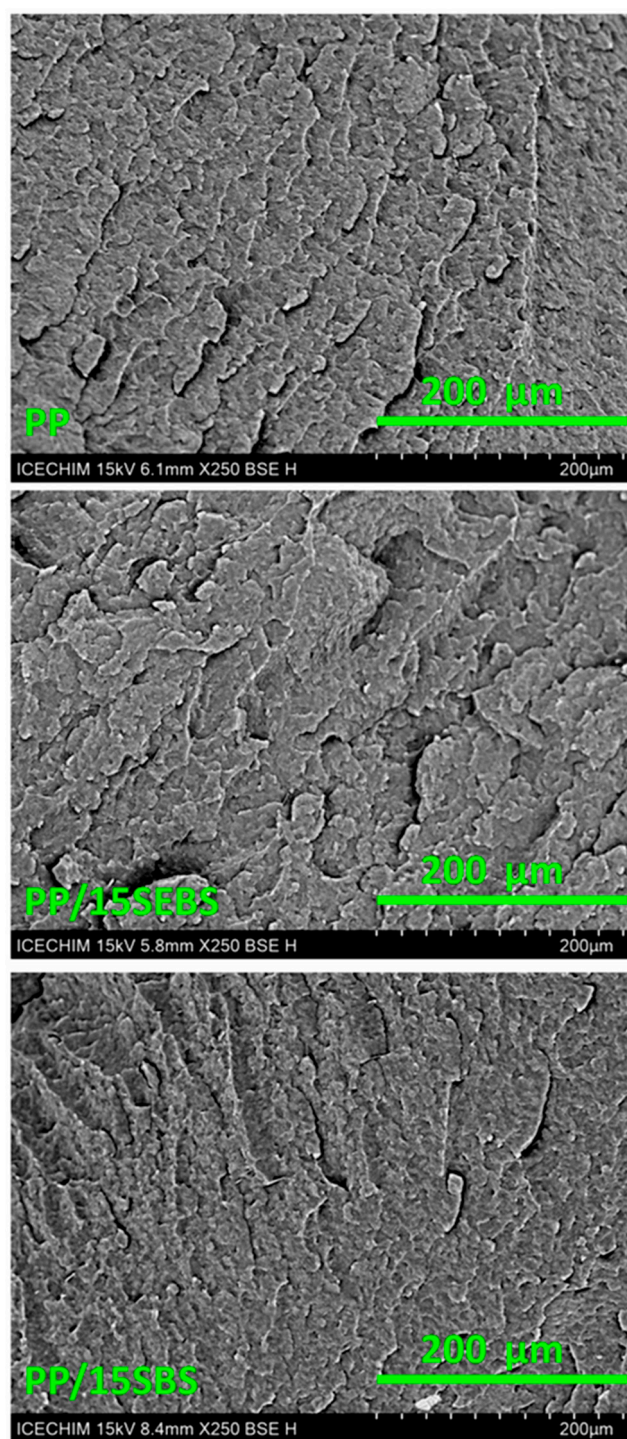

Figure S1. SEM images of PP and its blends (PP/15SEBS and PP/15SBS)

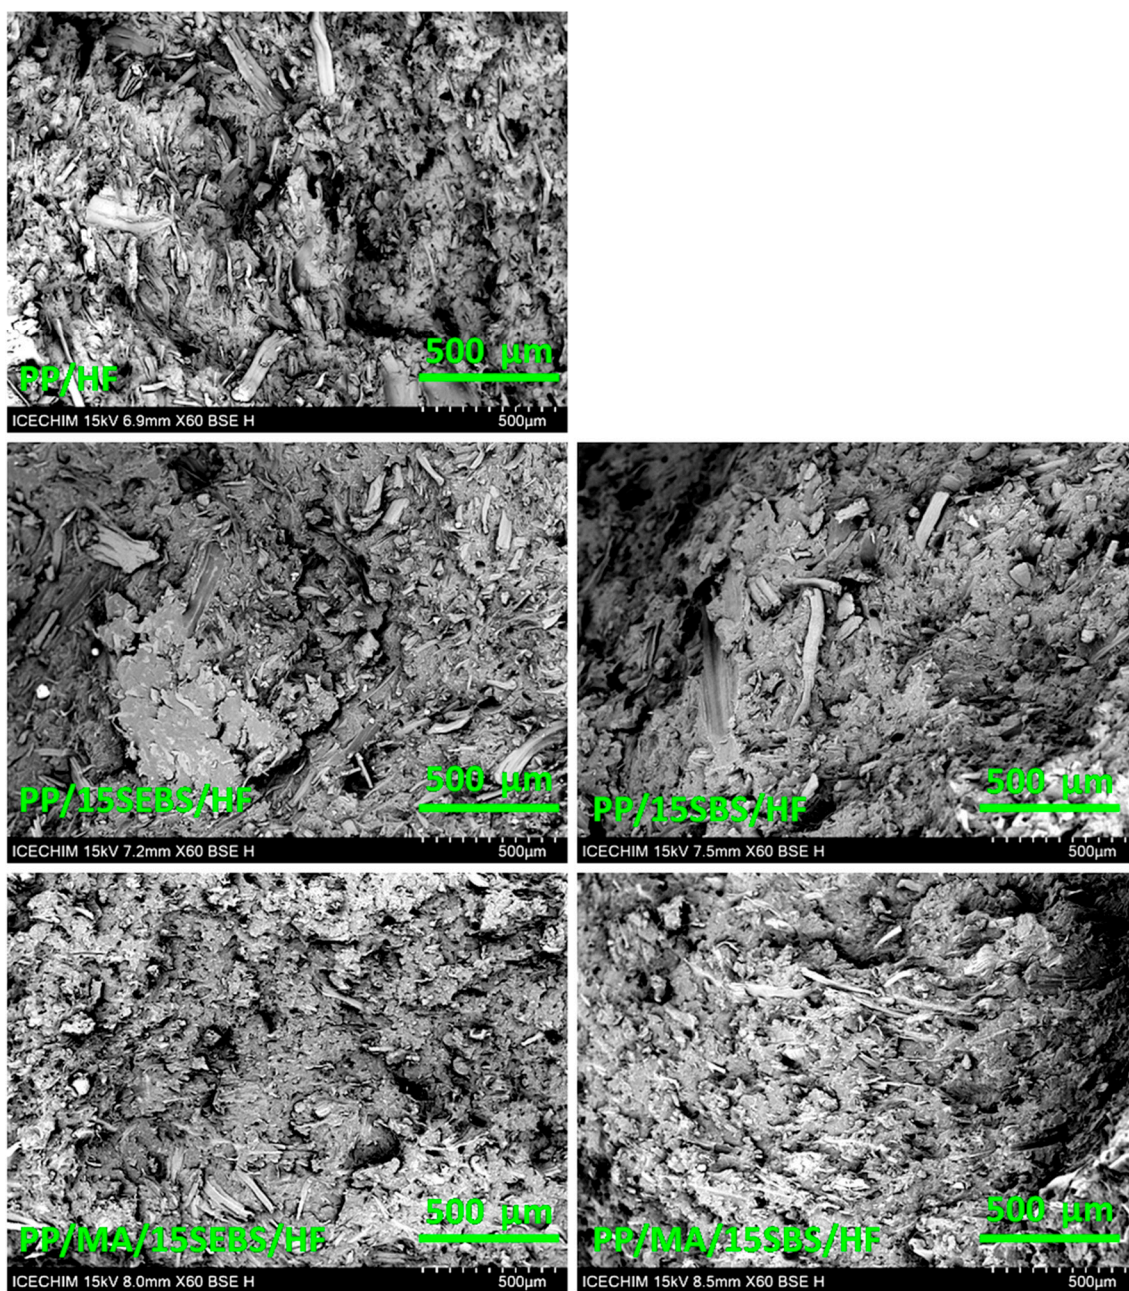

Figure S2. SEM images of fractured surfaces of composites
